# Supplementary material
Source: PubMed Central journal article supplement (PMC1913761)
Supplement: plntcell_tpc.106.046763_1.pdf [file plntcell_tpc.106.046763_1.pdf]

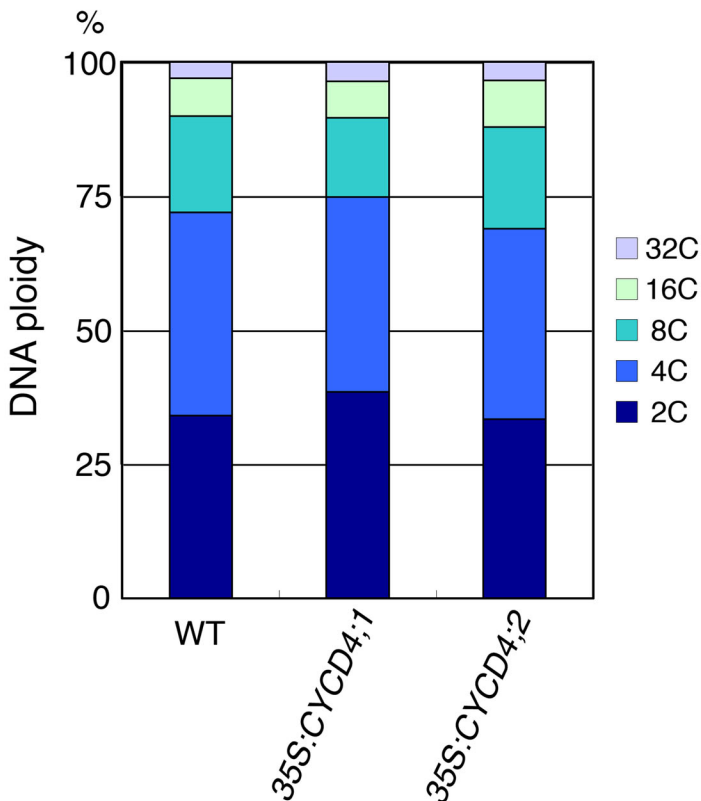

**Supplemental Figure 1.** DNA ploidy distribution in the wild-type and *CYCD4*-OE seedlings at 11 days after germination. DNA ploidy is expressed in terms of percentage.
