# Supplementary material
Source: PubMed Central journal article supplement (PMC1913761)
Supplement: plntcell_tpc.106.046763_2.pdf [file plntcell_tpc.106.046763_2.pdf]

**WT**

***35S:CYCD4;1***

***35S:CYCD4;2***

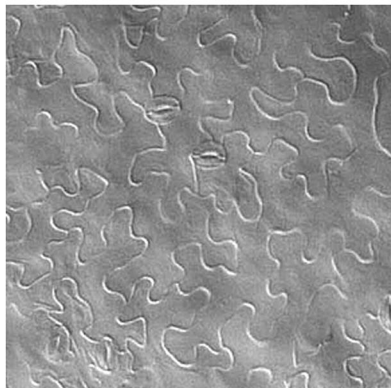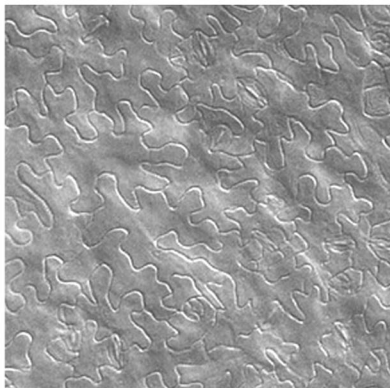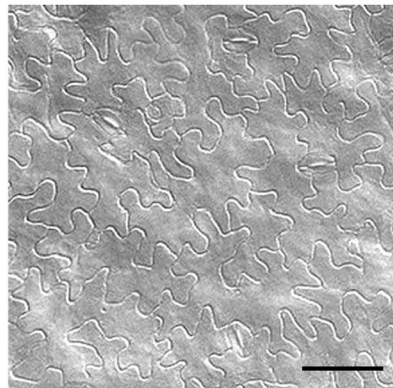

**Supplemental Figure 2.** Epidermal cells of the wild-type and *CYCD4*-OE leaves 20 days after germination. Bar = 50  $\mu\text{m}$ .
