# Supplementary material
Source: PubMed Central journal article supplement (PMC1913761)
Supplement: plntcell_tpc.106.046763_3.pdf [file plntcell_tpc.106.046763_3.pdf]

**A**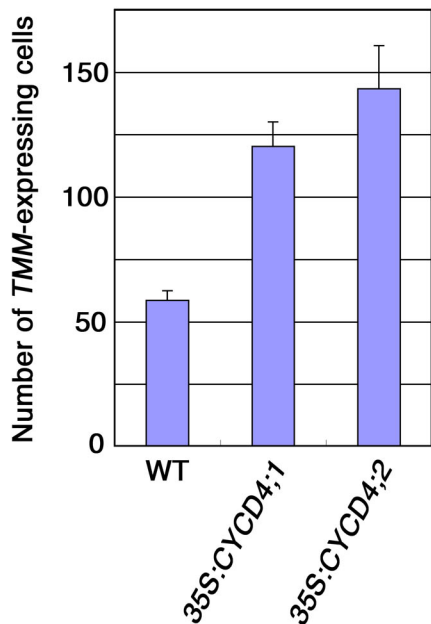**B**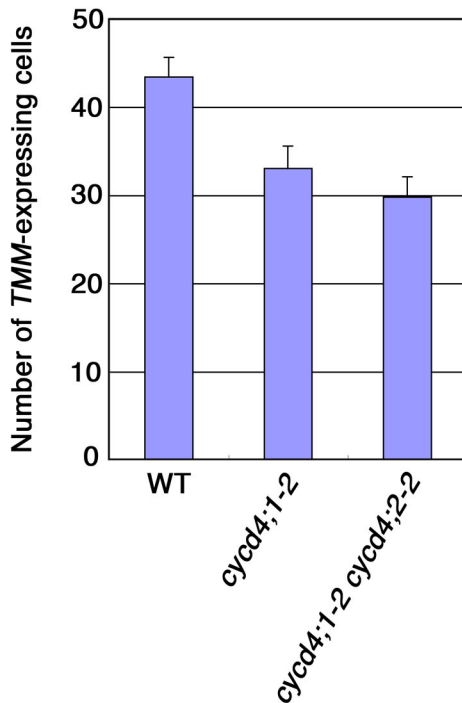

**Supplemental Figure 3.** Number of *TMM*-expressing cells visible on one surface of the entire hypocotyl. (A) The *TMM*-expressing cells in the wild-type and *CYCD4*-OE seedlings at 11 days after germination were counted by GUS staining. Data are presented as mean  $\pm$  SE for 10 samples. (B) The *TMM*-expressing cells in the wild-type and *cycd4* mutant seedlings at 4 days after germination were counted. Data are presented as mean  $\pm$  SE for 8 samples.
