# Supplementary material
Source: PubMed Central journal article supplement (PMC1913761)
Supplement: plntcell_tpc.106.046763_4.pdf [file plntcell_tpc.106.046763_4.pdf]

WT

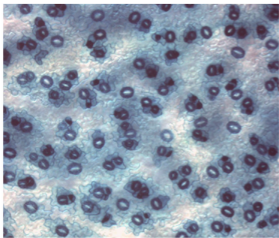

*35S:CYCD4;2*

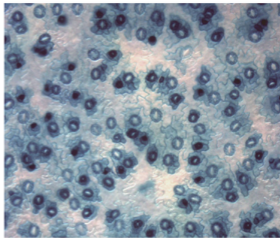

**Supplemental Figure 4.** *TMM* expression in leaves. The wild-type and *CYCD4;2*-OE plants that were transformed using the *Pro<sub>TMM</sub>:GUS* construct were subjected to GUS staining. We then observed the abaxial epidermis in the first leaves at 12 days after germination. Bar = 100  $\mu$ m.
